# Supplementary material for: Homoconjugated 4-aminopyridine salts: influence of anions on network topology
Source: Royal Society of Chemistry journal article supplement (doi:10.1039/c2ce26107c), 2012-10-05
Supplement: c2ce26107c.pdf [file c2ce26107c.pdf]

## SUPPLEMENTARY INFORMATION

# Homoconjugated 4-aminopyridine salts: Influence of anions on network topology

*Sarist Macksasitorn, Yang Hu and Jay R. Stork\**

Department of Chemistry, Lawrence University, 711 E. Boldt Way, Appleton, WI 54911 USA

E-mail: [jay.r.stork@lawrence.edu](mailto:jay.r.stork@lawrence.edu)

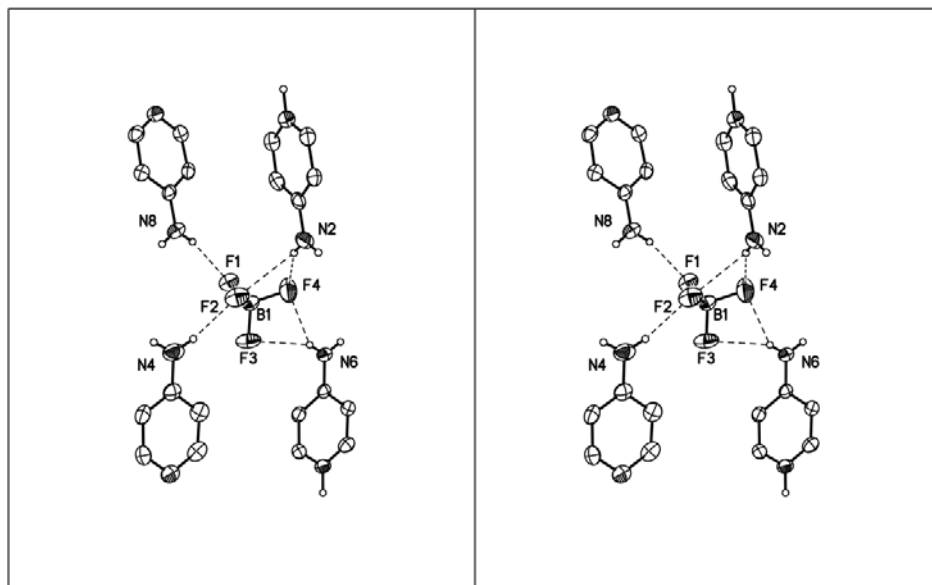

**Figure S1.** Stereo view of the hydrogen-bonding environment of the non-disordered anion in  $[(4\text{-AP})_2\text{H}]\text{BF}_4$ , drawn with 50 % thermal contours.

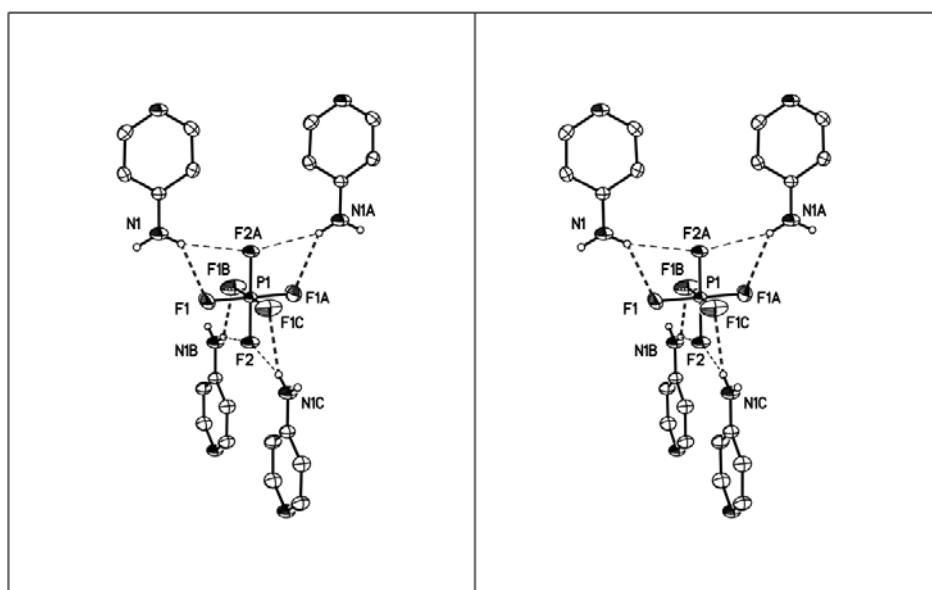

**Figure S2.** Stereo view of the hydrogen-bonding environment of the non-disordered anion in  $[(4\text{-AP})_2\text{H}]\text{PF}_4$ , drawn with 50 % thermal contours. Strong hydrogen bonds are drawn in bold. (See text.)

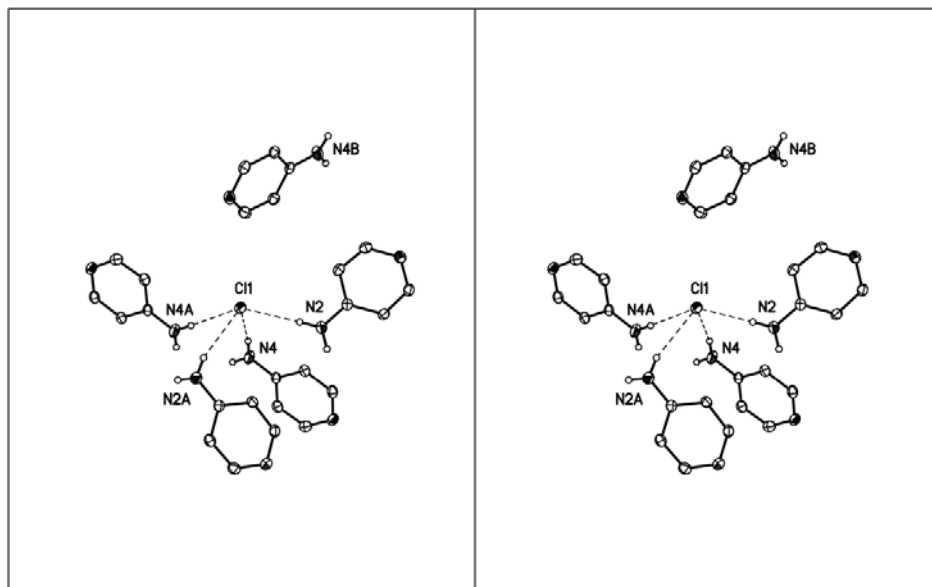

**Figure S3.** Stereo view of the environment of the Cl anion in  $[(4\text{-AP})_2\text{H}]\text{Cl}$ , drawn with 50 % thermal contours.

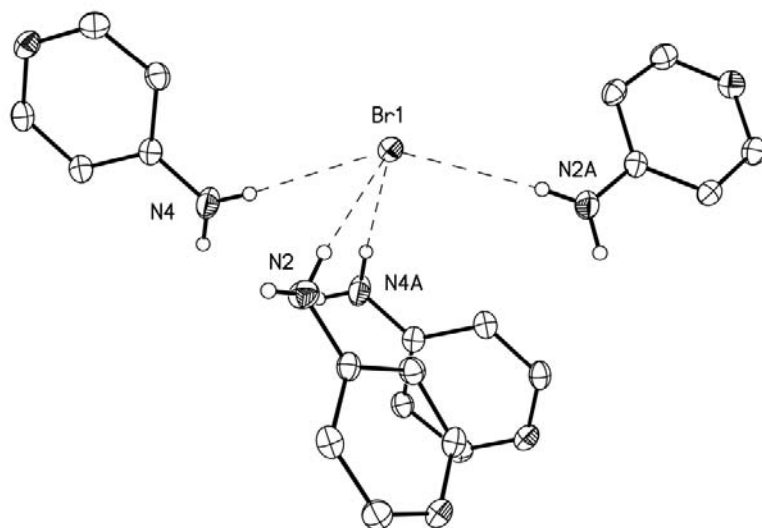

**Figure S4.** A view of the hydrogen bonding interactions about the Br anion in  $[(4\text{-AP})_2\text{H}]\text{Br}$ , drawn with 50 % thermal contours.

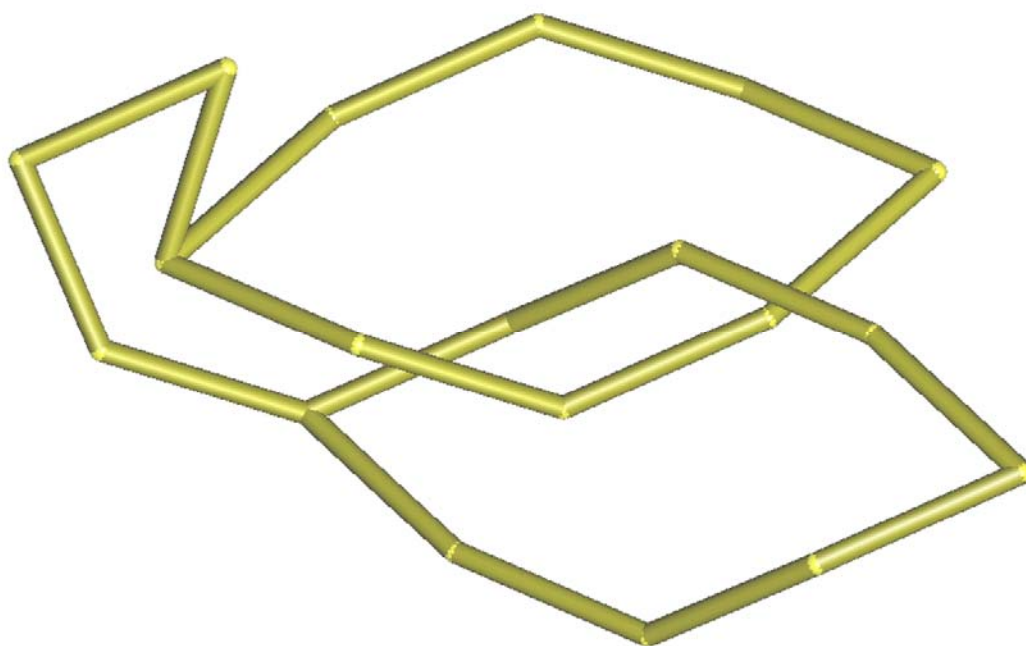

**Figure S5.** A view of two self-catenated circuits in  $[(4\text{-AP})_2\text{H}]\text{Cl}$ , showing shortest link between catenating circuits of three nodes.
